# New Premier Titles in Psychiatry

## Essentials of Clinical Psychopharmacology, Third Edition

Edited by Alan F. Schatzberg, M.D., and Charles B. Nemeroff, M.D., Ph.D.

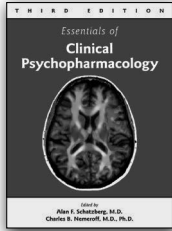

This third edition of *Essentials of Psychopharmacology* is based on the premier textbook in the field, *The American Psychiatric Publishing Textbook of Psychopharmacology*,

Fourth Edition. The *Essentials* format is designed to deliver core knowledge to the busy trainee or practitioner in a succinct and accessible manner.

2013 • 899 pages • ISBN 978-1-58562-419-5  
Paperback • \$159.00 • Item #62419

## Manual of Clinical Psychopharmacology for Nurses

Edited by Laura G. Leahy, M.S.N., P.M.H.-A.P.R.N., and Christian G. Kohler, M.D.

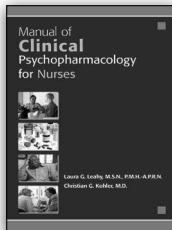

The book is designed to serve as both an academic textbook and a reference book for Psychiatric Mental Health Advanced Practice Registered Nurses (P.M.H.-A.P.R.N.s) as well as mental health practitioners, general practitioners, and consumers.

2013 • 560 pages • ISBN 978-1-58562-434-8  
Paperback • \$65.00 • Item #62434

## Psycho-Oncology

Edited by Thomas N. Wise, M.D., Massimo Biondi, M.D., and Anna Costantini, Ph.D.

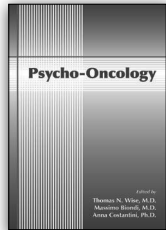

*Psycho-oncology* was written to assist oncologists, physicians, psychiatrists and other mental health clinicians, and hospital chaplains in understanding and offering supportive treatment to the individuals who will receive a cancer diagnosis during their lifetime.

2013 • 376 pages • ISBN 978-1-58562-423-2  
Paperback • \$74.00 • Item #62423

## Casebook of Neuropsychiatry

Edited by Trevor A. Hurwitz, M.B.Ch.B., and Warren T. Lee, M.D., Ph.D.

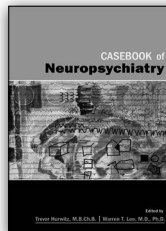

*Casebook of Neuropsychiatry* is comprised of 38 clinical cases based on real patient interactions that straddle the domains of neurology and psychiatry. The book is designed

to supplement comprehensive texts by providing real-world accounts of patient presentations that clinicians are likely to encounter.

2013 • 383 pages • ISBN 978-1-58562-431-7  
Paperback • \$75.00 • Item #62431

## Management of Adults With Traumatic Brain Injury

Edited by David B. Arciniegas, M.D., Nathan D. Zasler, M.D., Rodney D. Vanderploeg, Ph.D., and Michael S. Jaffee, M.D.

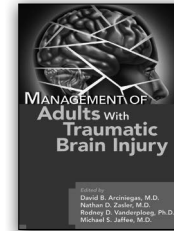

This is an up-to-the-minute, comprehensive, and useful text designed to support busy physicians, nurses, and mental health professionals working with persons with traumatic brain injury (TBI) and their families.

2013 • 587 pages • ISBN 978-1-58562-404-1  
Paperback • \$79.00 • Item #62404

## Clinical Guide to Depression and Bipolar Disorder

Findings From the Collaborative Depression Study  
Martin B. Keller, M.D., Editor-in-Chief

William H. Coryell, M.D., Jean Endicott, Ph.D., Jack D. Maser, Ph.D., and Pamela J. Schettler, Ph.D., Co-Editors

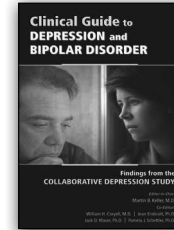

This book builds on research from the influential NIMH Collaborative Depression Study (CDS) to provide clinicians with information they can use to assess, diagnose, treat, and understand how their patients will likely fare over the course of their illness.

2013 • 234 pages • ISBN 978-1-58562-433-1  
Paperback • \$55.00 • Item #62433

**DSM-5**  
COLLECTION

## Diagnostic and Statistical Manual of Mental Disorders, Fifth Edition (DSM-5™)

American Psychiatric Association

2013 • 991 pages • ISBN 978-0-89042-554-1  
Hardcover • \$199.00 • Item #2554

2013 • 991 pages • ISBN 978-0-89042-555-8  
Paperback • \$149.00 • Item #2555

2013 • 991 pages • ISBN 978-0-89042-557-2  
eBook • \$149.00 • Item #2557

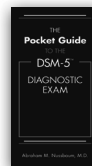

## The Pocket Guide to the DSM-5™ Diagnostic Exam

Abraham M. Nussbaum, M.D.

2013 • 281 pages • ISBN 978-1-58562-466-9 • Paperback  
\$65.00 • Item #62466

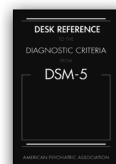

## Desk Reference to the Diagnostic Criteria From DSM-5™

American Psychiatric Association

2013 • 443 pages • ISBN 978-0-89042-556-5 • Paperback  
\$69.00 • Item #2556

American  
**Psychiatric**  
Publishing  
A Division of American Psychiatric Association

The First and Last Word in Psychiatry

Order Online: [www.appi.org](http://www.appi.org) • Phone: 1-800-368-5777 • Email: [appi@psych.org](mailto:appi@psych.org) • Fax: 703-907-1091

20% Discount For American Psychiatric Association Members! 25% Discount For APA Members-in-Training!

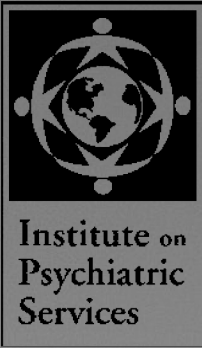

American Psychiatric Association

# 65<sup>TH</sup> IPS

PHILADELPHIA

OCTOBER 10 – 13, 2013

APA's Leading Educational Conference on Public, Community, and Clinical Psychiatry

## Transforming Psychiatric Practice, Reforming Health Care Delivery

### Preliminary Program

#### Who Should Attend?

- ▶ All APA Members, including Early Career Psychiatrists and Psychiatric Residents
- ▶ International Psychiatrists
- ▶ Primary Care Physicians
- ▶ Mental Health Professionals from all disciplines

#### Why You Should Attend

- ▶ Earn CME credit from over 100 expertly-led education sessions.
- ▶ Network with 1,500 mental health professionals and obtain solutions for the challenges you face.
- ▶ Interact with experts in small-group settings.
- ▶ Acquire new skills in clinical psychiatry to improve patient care.
- ▶ Assess a variety of treatment choices, including psychotherapeutic and pharmacological options.

[www.psychiatry.org/IPS](http://www.psychiatry.org/IPS)

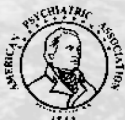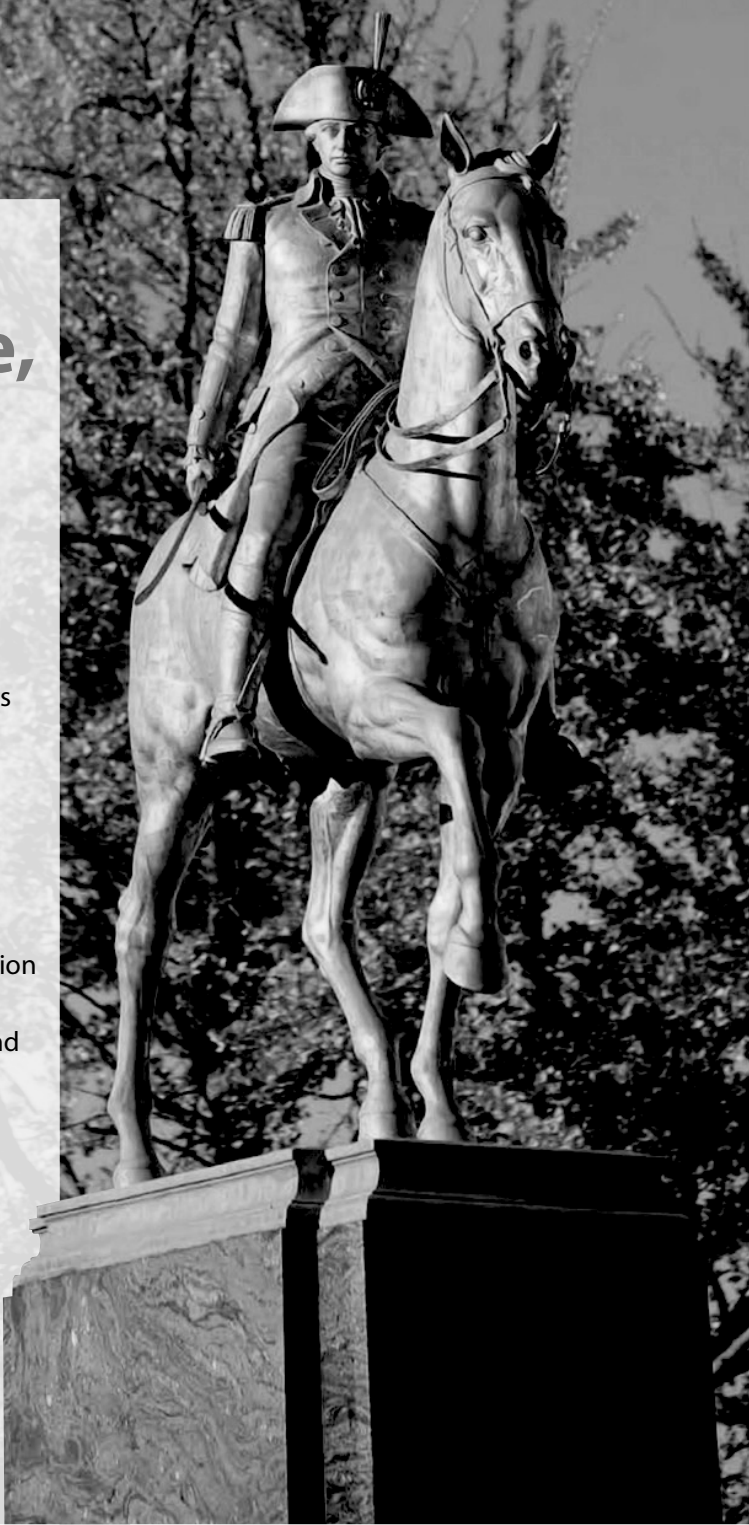

# American Neuropsychiatric Association

The American Neuropsychiatric Association (ANPA), established in 1988, is an organization of professionals in neuropsychiatry, behavioral neurology, neuropsychology and the clinical neurosciences. Our mission is to improve the lives of people with disorders at the interface of psychiatry and neurology.

One strength of our organization is our diverse membership, which is comprised of professionals in all areas of neuroscience who share clinical and/or academic interests in neuropsychiatry. The interdisciplinary makeup of the membership encourages collaboration among educators, clinicians, researchers, students and trainees during research presentations, symposia, workshops, and continuing education courses. *The Journal of Neuropsychiatry and Clinical Neurosciences (JNCN)* is the official publication of the organization, and a subscription is a benefit of membership.

ANPA holds an annual scientific meeting and provides up to 30 CME/CE credits. Members are encouraged to submit their work for presentation at our annual meetings. Travel awards are available for promising young investigators. Annual meeting abstracts and proceedings are published in *JNCN*.

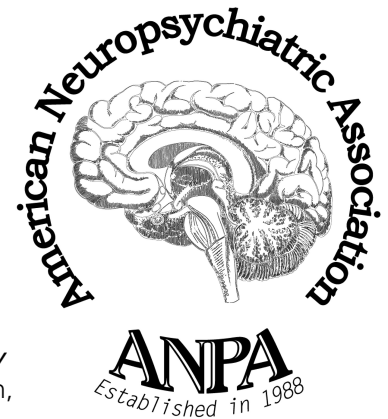

## Contact Information

### Benefits of Membership

- Subscription to *The Journal of Neuropsychiatry and Clinical Neurosciences (JNCN)*
- Discounts on subscriptions to PsychiatryOnline.com including DSM Premium and DSM Premium Plus
- Opportunities for presenting at the annual meeting with accepted abstracts published in the *JNCN*
- Significantly reduced registration fees at the annual meeting
- Newsletters, news updates, information on job and training opportunities, research and meeting information on the ANPA web site: [www.anpaonline.org](http://www.anpaonline.org)
- Discounted membership and meeting registration fees for trainees
- Collaboration in clinical, educational and research activities with opportunities to interact with leaders in the field

#### Website:

[www.anpaonline.org](http://www.anpaonline.org)

#### Email:

[anpa@osu.edu](mailto:anpa@osu.edu)

#### Phone:

614-447-2077

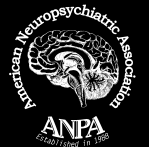

### Join ANPA Now!

**Don't miss ANPA's 25<sup>th</sup>  
Annual Meeting**

**Sheraton Seattle Hotel  
Seattle, Washington**

February 15-19, 2014

# Seattle Washington USA

Join online at: [www.anpaonline.org](http://www.anpaonline.org)

Celebrating Our 25<sup>th</sup> Annual Meeting!

# American Neuropsychiatric Association

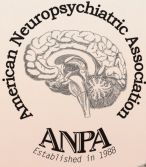

Sheraton Seattle Hotel  
February 15-19, 2014

## Seattle Washington USA

For more information contact the American Neuropsychiatric Association office:

700 Ackerman Road, Suite 625 • Columbus, Ohio USA 43202 • Phone: 614-447-2077 • E-mail: [anpa@osu.edu](mailto:anpa@osu.edu)

### ***THEME: Molecular Mechanisms in Neuropsychiatry***

**ADDITIONAL SESSIONS:** Frontotemporal Dementia, Mild Cognitive Impairment, and Clinical and Research Platform Presentations.

**SPECIAL INTEREST GROUPS:** Clinical Practice, Conversion Disorders, Dementia, Developmental Disorders and Pediatrics combined, Epilepsy, Forensics, Global Health, Movement Disorders, Neuroimaging, and Traumatic Brain Injury.

## Meeting Announcement & Call for Abstracts

You are invited to submit abstracts reporting  
new research or challenging clinical cases  
for poster or platform presentations.

Abstracts presented at the meeting will be published on-line in the spring 2014 issue of *The Journal of Neuropsychiatry and Clinical Neurosciences*.

Prior to submitting abstracts, please refer to our website for information about ANPA's award programs, platform sessions, and poster session.

**Deadline for receipt of abstracts is October 1, 2013.**

Meeting information can be found on the ANPA web site: [www.anpaonline.org](http://www.anpaonline.org) as it becomes available.

Complete submission instructions available at:

**[www.anpaonline.org](http://www.anpaonline.org)**

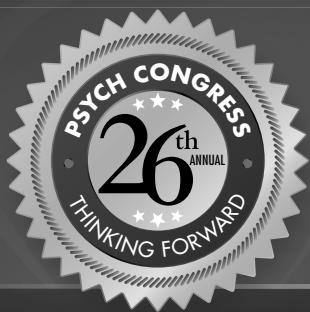

# U.S. Psychiatric AND Mental Health Congress CONFERENCE AND EXHIBITION 2013

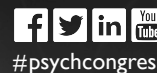

REGISTER BEFORE AUG 23 AND **SAVE UP TO \$400**

September 30–October 3, 2013  
THE VENETIAN, LAS VEGAS, NV

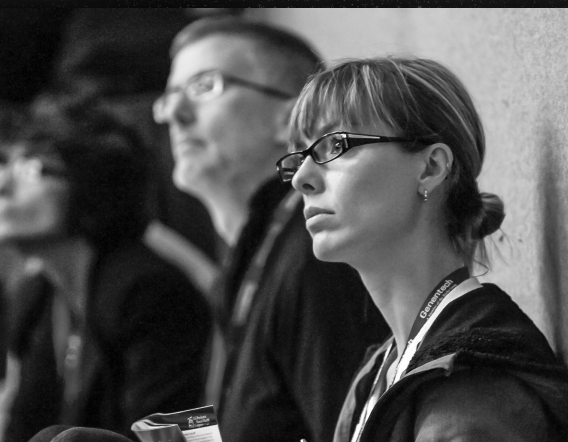

## POWERFUL PSYCH EDUCATION. INCREDIBLE VALUE.

- EARN UP TO **30 CME/CE CREDIT HOURS**
- ATTEND MORE THAN **50 EDUCATIONAL SESSIONS**
- INTERACT WITH MORE THAN **90 EXHIBITORS**
- EXPLORE RESEARCH FROM OVER **90 POSTER PRESENTERS**
- EXPERIENCE KEYNOTE SPEAKER **ERIC ARAUZ** AT OUR **PRE-CONFERENCE KICK-OFF RECEPTION (NON-CME)**

## PROGRAM PREVIEW

- **TREATING THE WHOLE PATIENT** | Beyond the Syndrome: Advances in the Integrated Science of Mood Disorders **JON W. DRAUD, MS, MD; RAKESH JAIN, MD, MPH; VLADIMIR MALETIC, MS, MD; CHARLES RAISON, MD; DILIP JESTE, MD**
- Successful Psychosocial Aging: Implications for Our Patients and Ourselves **DILIP JESTE, MD**
- Posttraumatic Stress Disorder: Recent Advances from Neurobiology to the Clinic **KERRY RESSLER, MD, PHD**
- Violence and Aggression: Managing the Acute Episode and Beyond **LESLIE CITROME, MD, MPH**
- The Dementia Dilemma: Diagnosis and Treatment of Agitation and Psychosis **MARC AGRONIN, MD**
- Premenstrual Dysphoric Disorder and Menopausal Depression **MARLENE FREEMAN, MD**
- ADHD Across the Lifespan: An Update **TIMOTHY WILENS, MD**
- Using Benzodiazepines: The Good, The Bad, and The Ugly **RAKESH JAIN, MD, MPH, AND SAUNDRA JAIN, MA, PSYD, LPC**
- Bringing Accountability to Office-Based Treatment of Depression **MARK ZIMMERMAN, MD**
- Taming the Beast: Practical and Effective Non-Pharmacological Treatment Options for Bipolar Depression **SAUNDRA JAIN, MA, PSYD, LPC**
- Diagnosis of Bipolar Disorder: Underdiagnosis, Overdiagnosis, and Why Screening Scales Are Not Good Enough **MARK ZIMMERMAN, MD**
- Neurostimulation for Mood Disorders **SCOTT AARONSON, MD**
- The Perils and Promise of Psychoactive Drugs: A Focus on Harm Reduction Psychiatry **ANDREW PENN, RN, MS, NP, CNS, APRN-BC**
- When Your Patient Dies by Suicide: Aftermath and Implications **BENJAMIN SADOCK, MD**
- DSM-5 Overview: What Clinicians Need to Know and Practical Applications **DARREL A. REGIER, MD, MPH**

The 2013 Psych Congress Scientific Program is Complete!  
**DOWNLOAD THE ATTENDEE BROCHURE AT OUR WEBSITE**

**WWW.PSYCHCONGRESS.COM/PSYCHCONGRESS 800-237-7285 EXT. 233**

**INTENDED LEARNERS** This activity is intended for psychiatrists, primary care physicians, psychologists, physician assistants, psychiatric nurses, and other health care professionals who seek to improve the care of patients with mental health disorders.

**LEARNING OBJECTIVES** After completing this activity, participants should be able to:

- Identify the etiology, pathophysiology, and neural pathways of various psychiatric disorders and their effects on patients
- Implement evidence-based models on the use of psychotherapeutic and pharmacotherapeutic interventions to develop treatment plans, predict treatment response, optimize remission, and prevent relapse
- Employ strategies to identify and remove barriers to treatment to improve patient outcomes

in the acute and long-term management of psychiatric disorders

- Increase ability to assess psychiatric disorders as well as patient's overall health, including comorbidities, with the goal of improving diagnosis and treatment

**ACCREDITATION INFORMATION** In support of improving patient care, North American Center for Continuing Medical Education, LLC (NACCME), is accredited by the Accreditation Council for Continuing Medical Education (ACCME), the Accreditation Council for Pharmacy Education (ACPE), and the American Nurses Credentialing Center (ANCC) to provide continuing education for the health care team.

**CME** NACCME designates this live activity for a maximum of 30 *AMA PRA Category 1 Credits*™. Physicians should claim only the

credit commensurate with the extent of their participation in the activity.

**CNE** This continuing nursing education activity awards 30.0 contact hours.

Provider approved by the California Board of Registered Nursing, Provider #13255 for 30.0 contact hours.

**APA** North American Center for Continuing Medical Education, LLC (NACCME) is approved by the American Psychological Association to sponsor continuing education for psychologists. NACCME maintains responsibility for this program and its content.

**INSTRUCTIONAL LEVEL** Advanced **REQUIREMENTS FOR CREDIT** To be eligible for documentation of credit, participants must attend the educational activity and complete the evaluation form. After successful completion

of the evaluation form online, participants may immediately print their documentation of credit.

Physician assistants, nurse practitioners, and nurses may participate in this educational activity and earn a certificate of completion as AAPA, AANP, and ANCC accept *AMA PRA Category 1 Credits*™ through their reciprocity agreements.

Other health care professionals treating patients with mental health disorders should check with their state licensing and certification boards to determine if *Psych Congress* meets their continuing education requirements.

**CONTACT INFORMATION** For questions regarding this educational activity, please call 609-630-6252.

Copyright © 2013 by North American Center for Continuing Medical Education, LLC. All rights

reserved. No part of this accredited continuing education activity may be reproduced or transmitted in any form or by any means, electronic or mechanical, without first obtaining permission from North American Center for Continuing Medical Education.

**ADA statement:** North American Center for Continuing Medical Education complies with the legal requirements of the Americans with Disabilities Act and the rules and regulations thereof. If any participant in this educational activity is in need of accommodations, please call 609-371-1137.

Supported in part by independent educational grants from Lilly USA, LLC, Sunovion Pharmaceuticals, Inc., PamLab, and Takeda Pharmaceuticals International, Inc. and Lundbeck.
