# THE JOURNAL OF NEUROPSYCHIATRY and Clinical Neurosciences

The Official Journal of the American Neuropsychiatric Association

## In this issue:

- A Look Inside the Mirror Neuron System
- Post-Treatment Lyme Syndrome and Central Sensitization
- Psychiatric Disorders in Children and Adolescents in the First Six Months After Mild Traumatic Brain Injury
- Aggression, Impulsivity, and Psychopathic Traits in Combined Antisocial Personality Disorder and Substance Use Disorder
- Tympanic Membrane Temperature, Hemispheric Activity, and Affect: Evidence for a Modest Relationship

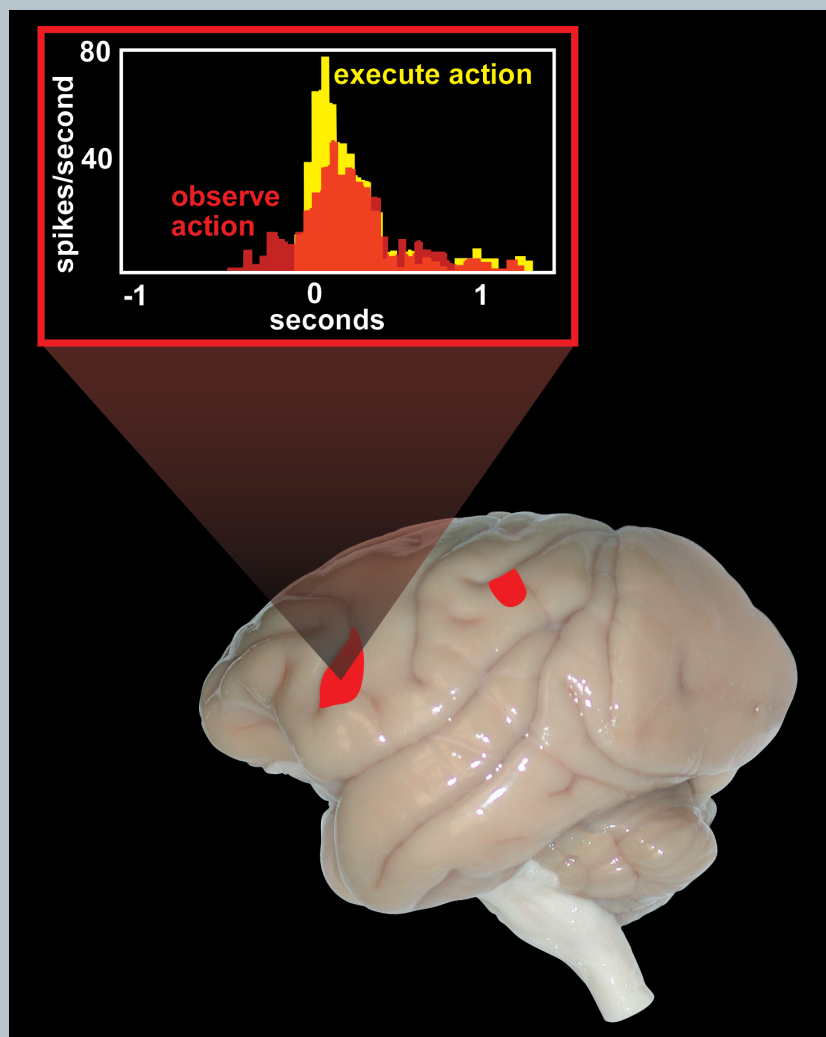

Source: https://neuro.psychiatryonline.org/doi/suppl/10.1176/jnp.2013.25.issue-3/suppl_file/cover.pdf
